# Supplementary material for: The Sensory Quality and the Textural Properties of Functional Oolong Tea-Infused Set Type Yoghurt with Inulin
Source: MDPI journal article supplement (doi:10.3390/foods10061242), 2021-05-29
Supplement: s1 [file s1]

## Supplementary Materials

Table S1. Table of sensory attributes and their definitions for the profiling of yoghurts.

| Sensory attributes                                | Definitions of attributes with the edge terms                                                    |
|---------------------------------------------------|--------------------------------------------------------------------------------------------------|
| <i>Odour</i>                                      |                                                                                                  |
| Sweet odour                                       | No definition required for basic odour quality (none - very intensive)                           |
| Sour odour                                        | No definition required for basic odour quality (none - very intensive)                           |
| Yoghurt odour                                     | No definition required for basic odour quality (none - very intensive)                           |
| Milky odour                                       | Characteristic odour of milk (none - very intensive)                                             |
| Fat odour                                         | Characteristic odour of fat milk (none - very intensive)                                         |
| Peach odour                                       | Characteristic odour of peach fruit (none - very intensive)                                      |
| Nectar odour                                      | Characteristic odour of nectar and flowers (none - very intensive)                               |
| Citrus odour                                      | Characteristic odour of citrus fruits (none - very intensive)                                    |
| <i>Appearance perceived visually</i>              |                                                                                                  |
| Colour intensity                                  | Visual aspect of colour intensity (light white - dark cream)                                     |
| Shine surface                                     | Visual presence of shine of the surface (mat – shiny)                                            |
| Whey presence                                     | Visual presence of whey in the product's surface and its amount (none - a lot of)                |
| Visual smoothness                                 | Visual evaluation of the degree of smoothness of the product surface (rough – smooth)            |
| Adhesiveness                                      | Visual evaluation of product density measured by the resistance of the teaspoon (thin – thick)   |
| Filling the teaspoon                              | Visual assessment of the filling of the teaspoon by placing the product on it (flat – conical)   |
| Consistency uniformity                            | visual assessment of the perceived consistency uniformity of the product (not uniform – uniform) |
| <i>Texture/consistency perceived in the mouth</i> |                                                                                                  |
| Smoothness in the mouth                           | Mouth evaluation perception of product smoothness (rough – smooth)                               |
| Melting                                           | Mouth assessment perception of product melting (much delayed – immediate)                        |
| Creaminess                                        | Mouth evaluation perception of creaminess connected with melting (thin – creamy)                 |
| Thickness                                         | Mouth evaluation perception of product density (thin – thick)                                    |
| Firmness                                          | Mouth evaluation perception of product firmness (loose – firm)                                   |
| Yield stress                                      | Mouth assessment perception of product viscosity (low viscosity- high viscosity)                 |
| Fat film                                          | Mouth evaluation perception of fatty film (none - very intensive)                                |
| <i>Taste/flavour</i>                              |                                                                                                  |
| Sweet taste                                       | No definition required for basic taste quality (none - very intensive)                           |
| Sour taste                                        | No definition required for basic taste quality (none - very intensive)                           |
| Bitter taste                                      | No definition required for basic taste quality (none - very intensive)                           |
| Astringent                                        | Astringency perception in the mouth (none - very intensive)                                      |

|                        |                                                                                                                                                |
|------------------------|------------------------------------------------------------------------------------------------------------------------------------------------|
| <b>Yoghurt flavour</b> | Characteristic flavour of yoghurt (none - very intensive)                                                                                      |
| <b>Milky flavour</b>   | Characteristic flavour of milk (none - very intensive)                                                                                         |
| <b>Quark flavour</b>   | Characteristic flavour of fresh cheese (none - very intensive)                                                                                 |
| <b>Peach flavour</b>   | Characteristic flavour of peach fruit (none - very intensive)                                                                                  |
| <b>Nectar flavour</b>  | Characteristic flavour of nectar and flowers (none - very intensive)                                                                           |
| <b>Body</b>            | Body defines harmonization of all evaluated positive attributes (incomplete – full)                                                            |
| <b>Overall quality</b> | Overall quality defines the overall impression of harmony of the positive attributes present, with little or no negative attributes (low–high) |

Table S2. Results of sensory expert (n=20) evaluation of following yoghurts: C-control, C1-control with 6% inulin, O-oolong tea, O1-oolong tea with 3% inulin, O2-oolong tea with 6% inulin, O3-oolong tea with 9% inulin.

| Attributes                                        | Yoghurt samples |       |       |       |       |       |
|---------------------------------------------------|-----------------|-------|-------|-------|-------|-------|
|                                                   | C               | C1    | O     | O1    | O2    | O3    |
| <b>Odour</b>                                      |                 |       |       |       |       |       |
| <b>Sweet odour*</b>                               | 1.1a            | 1.3a  | 2.5b  | 2.6b  | 3.0b  | 3.1b  |
| <b>Sour odour*</b>                                | 3.1b            | 2.9b  | 1.9a  | 1.9a  | 1.5a  | 1.6a  |
| <b>Yoghurt odour*</b>                             | 4.7b            | 4.3b  | 3.0a  | 3.0a  | 2.6a  | 2.6a  |
| <b>Milky odour*</b>                               | 4.1b            | 4.2b  | 2.8a  | 2.7a  | 2.8a  | 2.5a  |
| <b>Fat odour</b>                                  | 2.7a            | 3.1a  | 2.5a  | 2.3a  | 2.1a  | 1.9a  |
| <b>Peach odour*</b>                               | 0.0a            | 0.0a  | 3.4b  | 3.4b  | 4.0b  | 3.9b  |
| <b>Nectar odour*</b>                              | 0.0a            | 0.0a  | 3.7b  | 3.4b  | 4.2b  | 4.5b  |
| <b>Citrus odour*</b>                              | 0.0a            | 0.0a  | 1.2bc | 1.1bc | 1.3c  | 1.5c  |
| <b>Appearance perceived visually</b>              |                 |       |       |       |       |       |
| <b>Colour intensity*</b>                          | 0.9a            | 1.7ab | 3.0c  | 2.5bc | 1.9ab | 1.8ab |
| <b>Shine surface</b>                              | 7.8a            | 7.0a  | 7.8a  | 7.7a  | 7.8a  | 7.7a  |
| <b>Whey presence*</b>                             | 2.2a            | 1.4a  | 3.8b  | 3.4b  | 2.3a  | 1.6a  |
| <b>Visual smoothness</b>                          | 7.6a            | 7.5a  | 7.7a  | 7.6a  | 7.8a  | 7.7a  |
| <b>Adhesiveness</b>                               | 7.3ab           | 7.5b  | 6.8a  | 7.2ab | 6.9ab | 7.5b  |
| <b>Filing the teaspoon</b>                        | 7.2a            | 7.4a  | 6.6a  | 7.1a  | 7.2a  | 7.3a  |
| <b>Consistency uniformity</b>                     | 7.2ab           | 7.2ab | 7.4ab | 6.8a  | 7.6ab | 7.8b  |
| <b>Texture/consistency perceived in the mouth</b> |                 |       |       |       |       |       |
| <b>Smoothness in the mouth</b>                    | 7.3a            | 7.6a  | 7.5a  | 7.2a  | 7.7a  | 7.7a  |
| <b>Melting</b>                                    | 6.2a            | 6.8ab | 7.1b  | 6.8ab | 7.0ab | 7.0ab |
| <b>Creaminess*</b>                                | 4.5a            | 5.8ab | 5.6ab | 6.6b  | 6.4b  | 6.2b  |
| <b>Thickness in the mouth</b>                     | 6.7a            | 6.9a  | 6.0a  | 6.4a  | 6.0a  | 6.8a  |
| <b>Firmness*</b>                                  | 6.1a            | 7.0b  | 5.9a  | 6.6ab | 5.7a  | 6.1a  |
| <b>Yield stress</b>                               | 2.5ab           | 2.9ab | 2.1a  | 2.9ab | 3.0b  | 2.4ab |

|                         |       |       |       |       |       |       |
|-------------------------|-------|-------|-------|-------|-------|-------|
| <b>Fat film</b>         | 2.0a  | 2.9b  | 2.5ab | 2.9b  | 2.5ab | 3.0b  |
| <b>Taste/flavour</b>    |       |       |       |       |       |       |
| <b>Sweet taste*</b>     | 0.9a  | 3.9de | 1.6ab | 2.5bc | 3.0cd | 4.2e  |
| <b>Sour taste*</b>      | 4.9c  | 2.7a  | 4.0bc | 3.7ab | 3.9bc | 3.0ab |
| <b>Bitter taste*</b>    | 0.2a  | 0.1a  | 1.2b  | 0.9ab | 1.3b  | 0.8ab |
| <b>Astringent taste</b> | 0.9ab | 0.5a  | 1.2ab | 1.3b  | 1.1ab | 0.9ab |
| <b>Yoghurt flavour*</b> | 5.4c  | 4.9bc | 3.6a  | 3.9ab | 4.1ab | 3.7a  |
| <b>Milky flavour*</b>   | 4.6b  | 4.2b  | 2.7a  | 3.2a  | 2.7a  | 2.4a  |
| <b>Quark flavour</b>    | 2.7a  | 2.9a  | 1.8a  | 2.4a  | 2.4a  | 2.0a  |
| <b>Peach flavour*</b>   | 0.1a  | 0.2a  | 2.8b  | 2.7b  | 3.8b  | 3.7b  |
| <b>Nectar flavour*</b>  | 0.1a  | 0.2a  | 2.9b  | 2.7b  | 3.5b  | 3.9b  |
| <b>Body</b>             | 5.5ab | 5.8ab | 4.7a  | 5.4ab | 6.5b  | 6.0b  |
| <b>Overall quality</b>  | 5.6a  | 6.5a  | 5.4a  | 5.5a  | 6.3a  | 6.2a  |

\*Mean values differ significantly ( $p \leq 0.05$ ).

Table S3. Results of the semi-consumer ( $n=30$ ) assessment of acceptability of the following yoghurts: C-control, C1-control with 6% inulin, O-oolong tea, O1-oolong tea with 3% inulin, O2-oolong tea with 6% inulin, O3-oolong tea with 9% inulin, and willingness to buy them.

|                              | <b>C</b> | <b>C1</b> | <b>O</b> | <b>O1</b> | <b>O2</b> | <b>O3</b> |
|------------------------------|----------|-----------|----------|-----------|-----------|-----------|
| <b>Appearance</b>            | 7.2a     | 7.4a      | 6.8a     | 6.7a      | 7.5a      | 7.4a      |
| <b>Odour</b>                 | 6.5a     | 7.0a      | 6.8a     | 6.6a      | 6.8a      | 6.8a      |
| <b>Consistency</b>           | 6.2a     | 6.9a      | 6.4a     | 6.0a      | 6.9a      | 6.8a      |
| <b>Flavour</b>               | 5.4a     | 6.1a      | 6.0a     | 5.7a      | 6.2a      | 6.4a      |
| <b>Overall acceptability</b> | 5.8a     | 6.2a      | 5.7a     | 5.9a      | 6.5a      | 6.6a      |
| <b>Willingness to buy</b>    | 5.9a     | 6.0a      | 5.8a     | 5.7a      | 6.4a      | 6.6a      |

\*Mean values differ significantly ( $p \leq 0.05$ ).
